# Supplementary material for: Actual versus ideal body weight for acute kidney injury diagnosis and classification in critically Ill patients
Source: PubMed Central journal article supplement (PMC4236495; doi:10.1186/1471-2369-15-176), 2014-11-15

Table S1 Baseline characteristics of ICU patients grouped by the occurrence of AKI using ABW and IBW for diagnosis

| Characteristic             | ABW: AKI<br>IBW: AKI | ABW: AKI<br>IBW: No AKI | ABW: No AKI<br>IBW: No AKI | p      |
|----------------------------|----------------------|-------------------------|----------------------------|--------|
| Age, year                  | 70 (58-77)           | 68 (57-75)              | 66 (52-77)                 | 0.12   |
| Male sex                   | 80 (52)              | 20 (40)                 | 164 (57)                   | 0.08   |
| White                      | 138 (90)             | 45 (90)                 | 257 (89)                   | 0.96   |
| BMI, kg/m <sup>2</sup>     | 28 (24-34)           | 32 (29-35)              | 27 (23-32)                 | <0.001 |
| Body weight, kg            |                      |                         |                            |        |
| - Actual BW                | 82 (70-98)           | 89 (78-103)             | 81 (65-94)                 | 0.004  |
| - Ideal BW                 | 70 (60-78)           | 70 (61-78)              | 69 (58-76)                 | 0.23   |
| Baseline creatinine, mg/dL | 1.1 (0.8-1.4)        | 0.9 (0.8-1.2)           | 1 (0.8-1.2)                | 0.15   |
| Chronic kidney disease     | 59 (38)              | 12 (24)                 | 77 (27)                    | 0.02   |
| ICU type                   |                      |                         |                            | 0.46   |
| - Medical ICU              | 75 (49)              | 21 (42)                 | 120 (42)                   |        |
| - Surgical ICU             | 48 (31)              | 8 (16)                  | 104 (36)                   |        |
| - Mixed ICU                | 31 (20)              | 21 (42)                 | 65 (22)                    |        |
| APACHE III score           | 47 (36-61)           | 42 (30-53)              | 44 (32-59)                 | 0.08   |

Continuous data are presented as median (IQR), Categorical data are presented as n (%).

Table S2: AKI diagnoses and staging according to SCr and UO definition using actual and ideal BW

| AKI stage<br>(Actual BW + SCr) | AKI stage (ideal BW + SCr) |            |           |          | Total<br>N (%) |
|--------------------------------|----------------------------|------------|-----------|----------|----------------|
|                                | 0                          | 1          | 2         | 3        |                |
| 0                              | 244 (49.5)                 | 0 (0)      | 0 (0)     | 0 (0)    | 244 (49.5)     |
| 1                              | 36 (7.3)                   | 92 (18.7)  | 0 (0)     | 0 (0)    | 128 (26.0)     |
| 2                              | 4 (0.8)                    | 26 (5.3)   | 50 (10.1) | 0 (0)    | 80 (16.2)      |
| 3                              | 0 (0)                      | 0 (0)      | 1 (0.2)   | 40 (8.1) | 41 (8.3)       |
| Total, N (%)                   | 284 (57.6)                 | 118 (23.9) | 51 (10.3) | 40 (8.1) | 493            |

Kappa = 0.84 (95% CI 0.79-0.89) and percentage agreement = 92 %

Kappa = 0.86 (95% CI 0.82-0.89) and percentage agreement = 86.4 %

Table S3: 90-day mortality risk

| Actual BW | Ideal BW | N   | 90-mortality rate | Adjusted OR(95% CI)* |
|-----------|----------|-----|-------------------|----------------------|
| AKI       | AKI      | 209 | 21.1%             | 1.65 (0.99-2.77)     |
| AKI       | No AKI   | 40  | 10.0%             | 0.83 (0.23-2.32)     |
| No AKI    | No AKI   | 244 | 12.7%             | Reference            |

\* OR is adjusted for age and APACHE score

Figure S1: 90-day mortality rate according to AKI stages (SCr and UO definition)

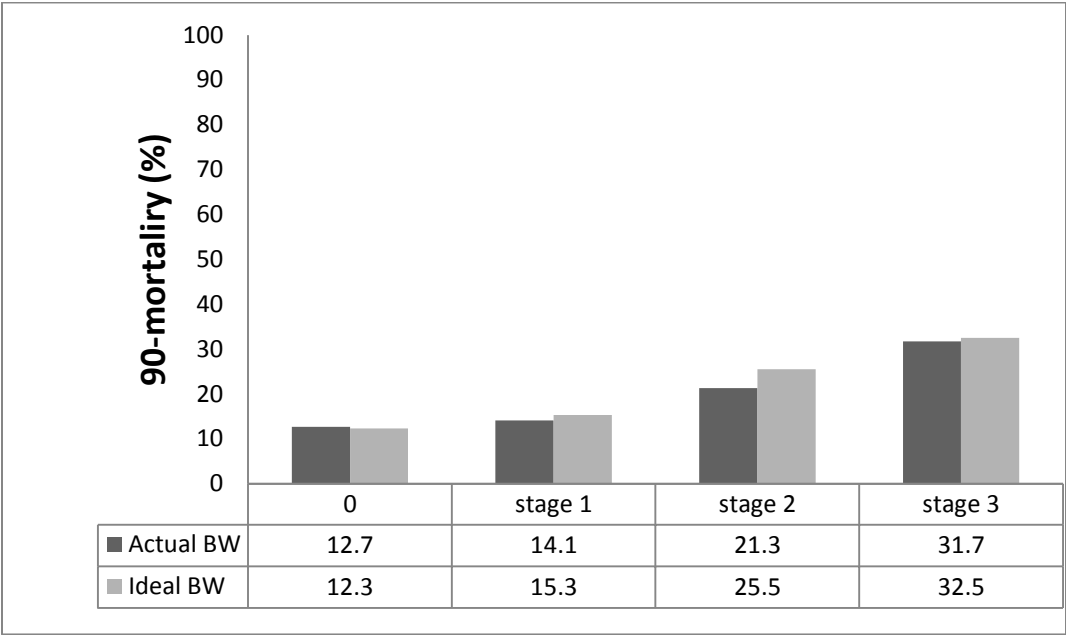

Supplement: 12882_2014_865_MOESM1_ESM.pdf [file 12882_2014_865_MOESM1_ESM.pdf]
